# Supplementary material for: Role of different molecular fragments in formation of the supramolecular architecture of the crystal of 1,1-dioxo-tetrahydro-1λ6-thiopyran-3-one
Source: Royal Society of Chemistry journal article supplement (doi:10.1039/c2ce26332g), 2012-01-01
Supplement: c2ce26332g.pdf [file c2ce26332g.pdf]

## Electronic Supporting Information

### Role of Different Molecular Fragments in Formation of the Supramolecular Architecture of the Crystal of 1,1-Dioxo-tetrahydro-1 $\lambda^6$ -thiopyran-3-one

Oleg V. Shishkin, Volodymyr V. Medvediev, Roman I. Zubatyuk, Olena O. Shyshkina, Nataliya V.

Kovalenko, Julian M. Volovenko

Table S1. Energy of interactions of basic molecule **1** with molecules belonging to its first coordination sphere. Dimers belonging to basic structural motif are highlighted in bold.

| Dimer       | Symmetry code      | E <sub>int.</sub> , kcal/mol |
|-------------|--------------------|------------------------------|
| 1-1         | -1+x,-1+y,z        | -1.93                        |
| 1-2         | -1+x,y,z           | -3.85                        |
| <b>1-3</b>  | <b>x,-1+y,z</b>    | <b>-5.79</b>                 |
| <b>1-4</b>  | <b>x,1+y,z</b>     | <b>-5.79</b>                 |
| 1-5         | 1+x,y,z            | -3.85                        |
| 1-6         | 1+x,1+y,z          | -1.93                        |
| 1-7         | -x,-y,1-z          | -6.93                        |
| <b>1-8</b>  | <b>1-x,-y,1-z</b>  | <b>-14.35</b>                |
| <b>1-9</b>  | <b>1-x,-y,2-z</b>  | <b>-0.54</b>                 |
| <b>1-10</b> | <b>1-x,1-y,1-z</b> | <b>-7.63</b>                 |
| <b>1-11</b> | <b>1-x,1-y,2-z</b> | <b>-7.57</b>                 |
| 1-12        | 2-x,1-y,2-z        | -4.47                        |
| 1-13        | 2-x,2-y,2-z        | 0.61                         |

Table S2. Energy of interactions of basic molecule **2** with molecules belonging to its first coordination sphere. Dimers belonging to basic structural motif are highlighted in bold.

| Dimer       | Symmetry code           | $E_{\text{int.}}$ , kcal/mol |
|-------------|-------------------------|------------------------------|
| 2-1         | 1.5-x,-0.5+y,-z         | -2.84                        |
| <b>2-2</b>  | <b>1.5-x,-0.5+y,1-z</b> | <b>-4.53</b>                 |
| 2-3         | 1.5-x,0.5+y,-z          | -2.84                        |
| <b>2-4</b>  | <b>1.5-x,0.5+y,1-z</b>  | <b>-4.53</b>                 |
| 2-5         | 1-x,1-y,-z              | -1.81                        |
| <b>2-6</b>  | <b>1-x,1-y,1-z</b>      | <b>-12.29</b>                |
| 2-7         | 2-x,1-y,-z              | -4.00                        |
| <b>2-8</b>  | <b>2-x,1-y,1-z</b>      | <b>-1.72</b>                 |
| <b>2-9</b>  | <b>-0.5+x,0.5-y,z</b>   | <b>-8.90</b>                 |
| <b>2-10</b> | <b>-0.5+x,1.5-y,z</b>   | <b>-1.24</b>                 |
| <b>2-11</b> | <b>0.5+x,0.5-y,z</b>    | <b>-8.90</b>                 |
| <b>1-12</b> | <b>0.5+x,1.5-y,z</b>    | <b>-1.24</b>                 |

Table S3. Energy of interactions of basic molecule **3** with molecules belonging to its first coordination sphere. Dimers belonging to basic structural motif are highlighted in bold.

| Dimer       | Symmetry code         | $E_{\text{int.}}$ , kcal/mol |
|-------------|-----------------------|------------------------------|
| <b>3-1</b>  | <b>x,y,-1+z</b>       | <b>0.73</b>                  |
| <b>3-2</b>  | <b>x,y,1+z</b>        | <b>0.73</b>                  |
| 3-3         | -0.5+x,-0.5+y,z       | -4.98                        |
| 3-4         | -0.5+x,0.5+y,z        | -4.98                        |
| 3-5         | 0.5+x,-0.5+y,z        | -4.98                        |
| 3-6         | 0.5+x,0.5+y,z         | -4.98                        |
| 3-7         | 1-x,-y,-0.5+z         | 0.79                         |
| 3-8         | 1-x,-y,0.5+z          | 0.79                         |
| <b>3-9</b>  | <b>1-x,1-y,-0.5+z</b> | <b>-7.85</b>                 |
| <b>3-10</b> | <b>1-x,1-y,0.5+z</b>  | <b>-7.85</b>                 |
| 3-11        | 0.5-x,0.5-y,-0.5+z    | -5.73                        |
| 3-12        | 0.5-x,0.5-y,0.5+z     | -5.73                        |
| 3-13        | 1.5-x,0.5-y,-0.5+z    | -5.73                        |
| 3-14        | 1.5-x,0.5-y,0.5+z     | -5.73                        |

Table S4. Energy of interactions of basic molecule **4** with molecules belonging to its first coordination sphere. Dimers belonging to basic structural motif are highlighted in bold.

| Dimer      | Symmetry code          | $E_{\text{int.}}$ , kcal/mol |
|------------|------------------------|------------------------------|
| <b>4-1</b> | <b>-1+x,y,z</b>        | <b>-3.03</b>                 |
| 4-2        | x,-1+y,z               | -1.96                        |
| 4-3        | x,1+y,z                | -1.96                        |
| <b>4-4</b> | <b>1+x,y,z</b>         | <b>-3.03</b>                 |
| 4-5        | -0.5+x,-0.5-y,-z       | -1.92                        |
| <b>4-6</b> | <b>-0.5+x,0.5-y,-z</b> | <b>-4.96</b>                 |
| 4-7        | 0.5+x,-0.5-y,-z        | -1.92                        |
| <b>4-8</b> | <b>0.5+x,0.5-y,-z</b>  | <b>-4.96</b>                 |
| 4-9        | -x,-0.5+y,0.5-z        | -1.19                        |
| 4-10       | -x,0.5+y,0.5-z         | -1.19                        |
| 4-11       | 1-x,-0.5+y,0.5-z       | -3.26                        |
| 4-12       | 1-x,0.5+y,0.5-z        | -3.26                        |

Table S5. Energy of interactions of basic molecule **5** with molecules belonging to its first coordination sphere. Dimers belonging to basic structural motif are highlighted in bold.

| Dimer       | Symmetry code      | $E_{\text{int.}}$ , kcal/mol |
|-------------|--------------------|------------------------------|
| 5-1         | -1+x,y,-1+z        | -1.24                        |
| 5-2         | -1+x,y,z           | -5.94                        |
| <b>5-3</b>  | <b>x,y,-1+z</b>    | <b>-3.28</b>                 |
| <b>5-4</b>  | <b>x,y,1+z</b>     | <b>-3.28</b>                 |
| 5-5         | 1+x,y,z            | -5.94                        |
| 5-6         | 1+x,y,1+z          | -1.24                        |
| 5-7         | -x,1-y,-z          | -0.23                        |
| <b>5-8</b>  | <b>1-x,-y,-z</b>   | <b>-13.66</b>                |
| <b>5-9</b>  | <b>1-x,-y,1-z</b>  | <b>-2.68</b>                 |
| <b>5-10</b> | <b>1-x,1-y,-z</b>  | <b>-10.23</b>                |
| <b>5-11</b> | <b>1-x,1-y,1-z</b> | <b>-10.40</b>                |
| 5-12        | 2-x,-y,1-z         | -1.44                        |
| 5-13        | 2-x,1-y,1-z        | -2.00                        |

Table S6. Energy of interactions of basic molecule **6** with molecules belonging to its first coordination sphere. Dimers belonging to basic structural motif are highlighted in bold.

| Dimer       | Symmetry code           | $E_{\text{int.}}$ , kcal/mol |
|-------------|-------------------------|------------------------------|
| <b>6-1</b>  | <b>x,y,-1+z</b>         | <b>-3.30</b>                 |
| <b>6-2</b>  | <b>x,y,1+z</b>          | <b>-3.30</b>                 |
| 6-3         | -0.5+x,0.5-y,1-z        | -6.16                        |
| 6-4         | -0.5+x,0.5-y,2-z        | -3.66                        |
| 6-5         | 0.5+x,0.5-y,1-z         | -6.16                        |
| 6-6         | 0.5+x,0.5-y,2-z         | -3.66                        |
| 6-7         | 1-x,-0.5+y,1.5-z        | -3.26                        |
| 6-8         | 1-x,0.5+y,1.5-z         | -3.26                        |
| <b>6-9</b>  | <b>0.5-x,1-y,-0.5+z</b> | <b>-13.18</b>                |
| <b>6-10</b> | <b>0.5-x,1-y,0.5+z</b>  | <b>-13.18</b>                |
| 6-11        | 1.5-x,1-y,-0.5+z        | -5.00                        |
| 6-12        | 1.5-x,1-y,0.5+z         | -5.00                        |
